# Supplementary material for: A cyclic process for full enzymatic saccharification of pretreated cellulose with full recovery and reuse of the ionic liquid 1-butyl-3-methylimidazolium chloride
Source: Royal Society of Chemistry journal article supplement (doi:10.1039/c2gc35905g), 2012-01-01

## SUPPLEMENTARY INFORMATION.

### A cyclic process for full enzymatic saccharification of pretreated cellulose with full recovery and reuse of the ionic liquid 1-butyl-3-methylimidazolium chloride.

Pedro Lozano\*<sup>a</sup>, Berenice Bernal<sup>a</sup>, Imanol Recio<sup>a</sup> and Marie-Pierre Belleville<sup>b</sup>

<sup>a</sup> Departamento de Bioquímica y Biología Molecular B e Inmunología. Facultad de Química, Universidad de Murcia, P.O. Box 4021, E-30100 Murcia, Spain. Fax: +34.868.88.41.48; Phone: +34.868.88.73.92; Email: plozanor@um.es.

<sup>b</sup> IEM (Institut Européen des Membranes), UMR 5635 (CNRS-ENSCM-UM2), Université Montpellier 2, Place E. Bataillon, F-34095, Montpellier, France. Fax : +33 467149119; Tel: +33 467149148.

#### NMR analysis of [Bmim][Cl]

<sup>1</sup>H-NMR spectra of 10 mg/mL [Bmim][Cl] samples were recorded on a Bruker-AC-200E (200 MHz) instrument, using D<sub>2</sub>O as solvent. Sample 1) *Standard [Bmim][Cl]*: pure IL; sample 2) *Reused [Bmim][Cl]*: IL recovered and reused 5-times following the iterative protocol described in Experimental section; sample 3) *Reused [Bmim][Cl]+charcoal*: IL from sample 2 after cleaning by treatment with charcoal for 48 h at room temperature.

#### Sample 1. Standard [Bmim][Cl]

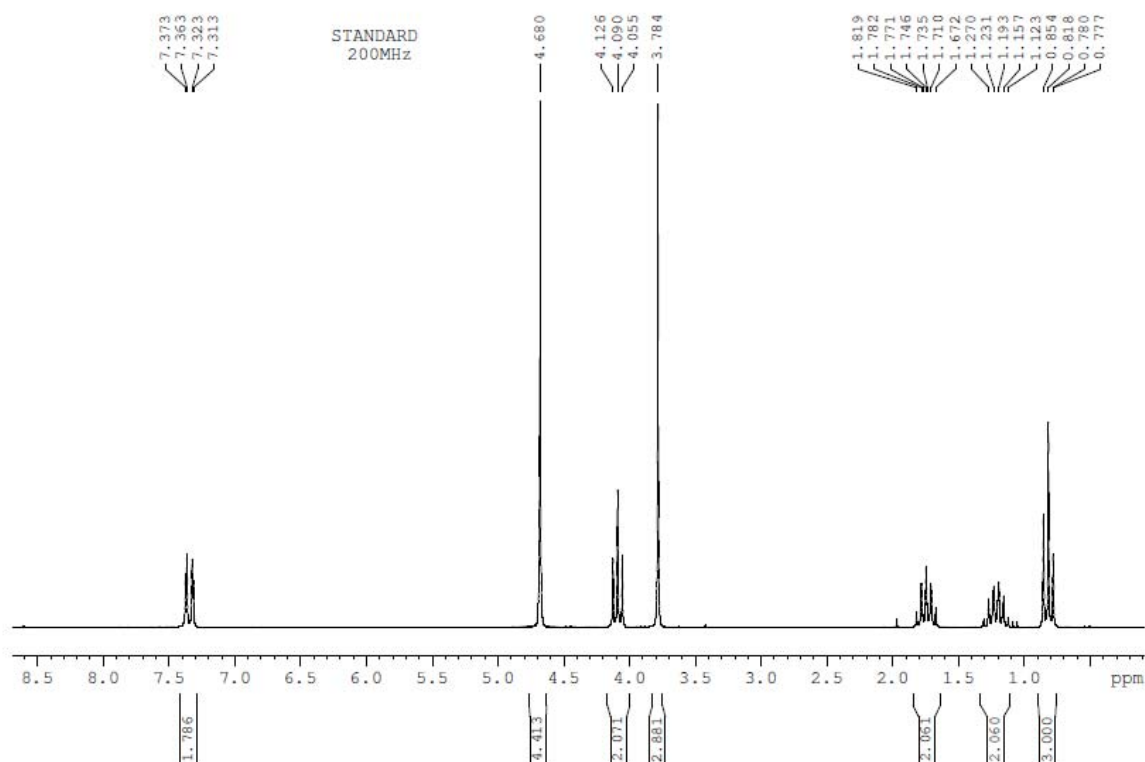

Sample 2. Reused [Bmim][Cl]

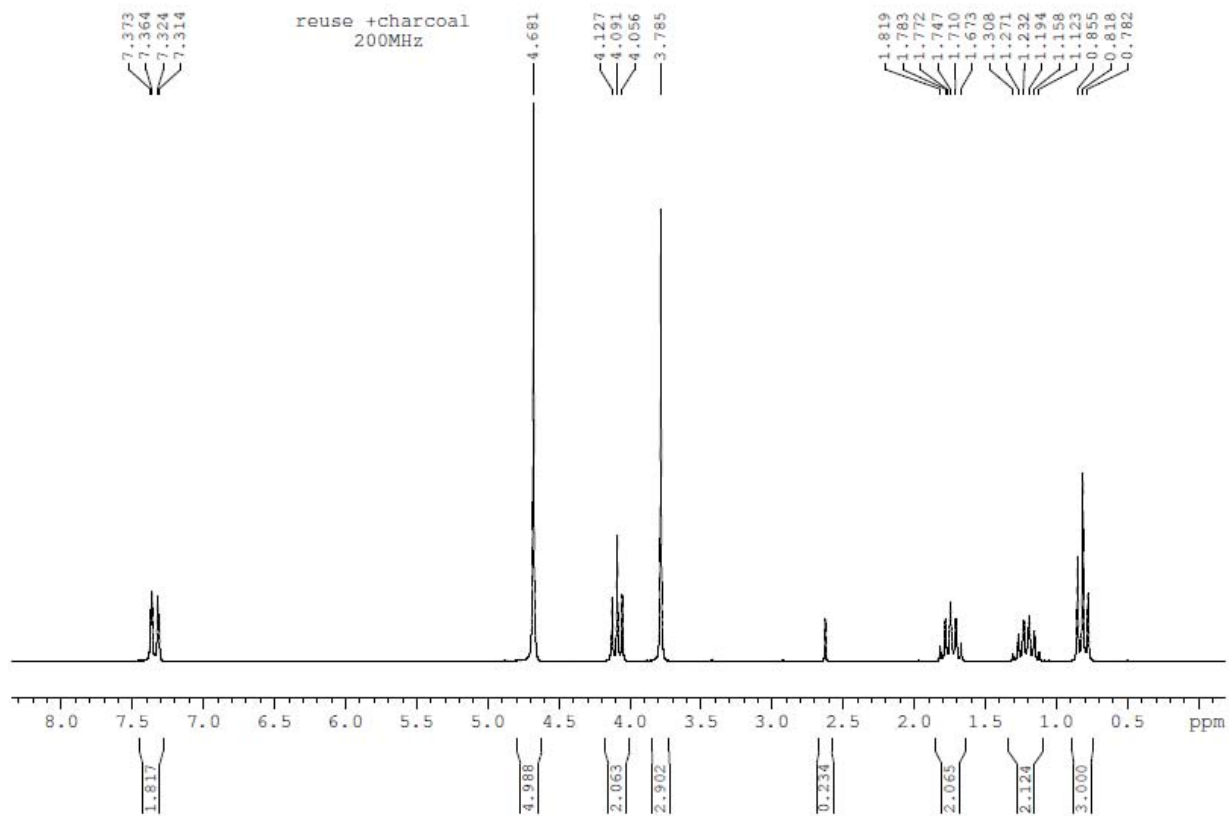

Sample 3. Reused [Bmim][Cl] and cleaned with charcoal

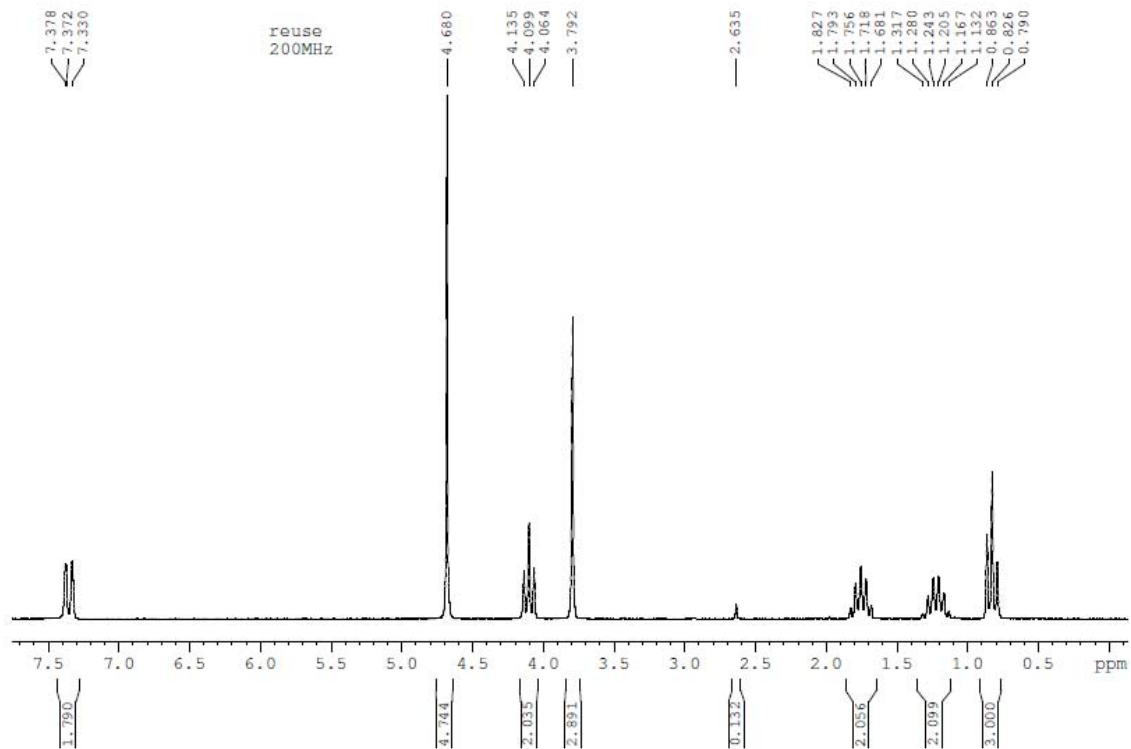

### Comparative spectra

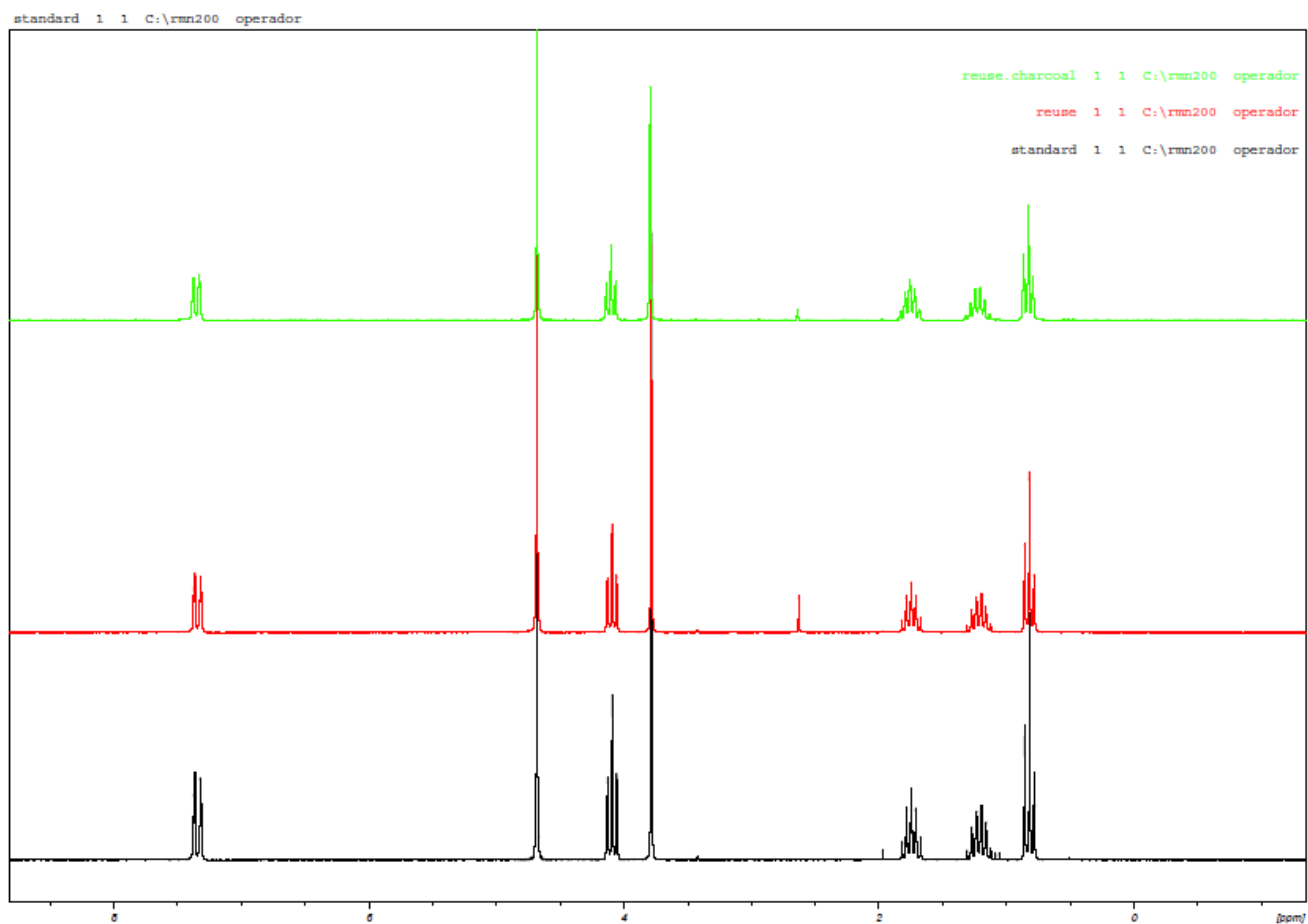

Supplement: c2gc35905g.pdf [file c2gc35905g.pdf]
